# Supplementary material for: Type I fatty acid synthase trapped in the octanoyl‐bound state
Source: PubMed Central journal article supplement (PMC6954729; doi:10.1002/pro.3797), 2020-01-11
Supplement: PRO-29-589-s001.pdf [file PRO-29-589-s001.pdf]

# Supplementary Information

## Type I fatty acid synthase (FAS) trapped in the octanoyl-bound state

Alexander Rittner, Karthik S. Paithankar, Aaron Himmler, and Martin Grininger\*

### Author affiliations

Institute of Organic Chemistry and Chemical Biology, Buchmann Institute for Molecular Life Sciences, Goethe University Frankfurt, Max-von-Laue-Str. 15, 60438 Frankfurt am Main, Germany

### Correspondence

\*grininger@chemie.uni-frankfurt.de

### Table of contents:

#### Supplementary Figures:

Figure S1: Purification and crystallization of the KS-MAT didomain

Figure S2: Validation of ligand placement in the MAT domain

Figure S3: Stereo cartoon diagram to illustrate conformational changes in the MAT domain

Figure S4: Anisotropic movement of C-alpha atoms in the ferredoxin-like subdomain

Figure S5: Ramachandran plots for crucial residues in both subdomain linkers

Figure S6: Dynamics of the MAT domain is determined by flexible subdomain linkers

Figure S7: Rotational freedom of residue R606

Figure S8: Stability of select KS-MAT variants

Figure S9: Global Michaelis-Menten fit of KS-mediated transacylation data

#### Supplementary Tables

Table S1: Dimerization interface of the KS domain

Table S2: Primers and Plasmids

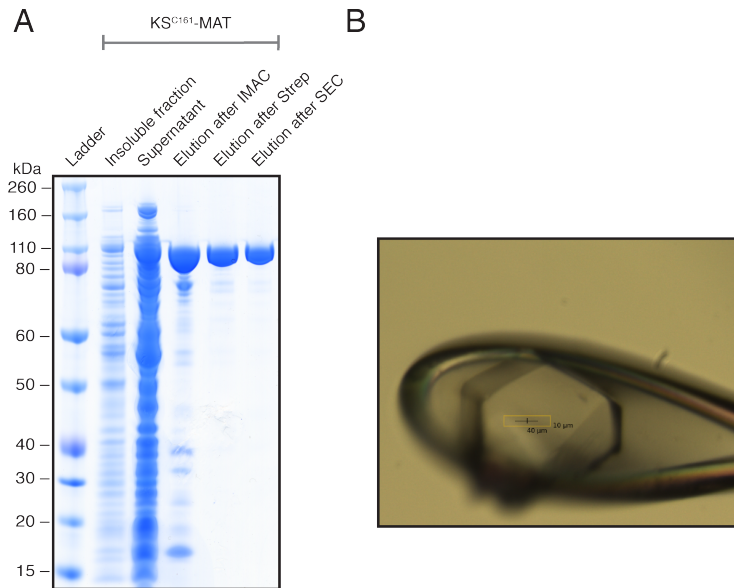

**Figure S1: Purification and crystallization of the KS-MAT didomain.** (A) SDS-PAGE (NuPAGE 4-12 % Bis-Tris) of the purification strategy of the KS-MAT didomain. A tandem purification using Ni-chelating and Strep-Tactin affinity chromatography was followed by size exclusion. (B) Photograph of the octanoyl-CoA soaked crystal within a nylon loop at the synchrotron.

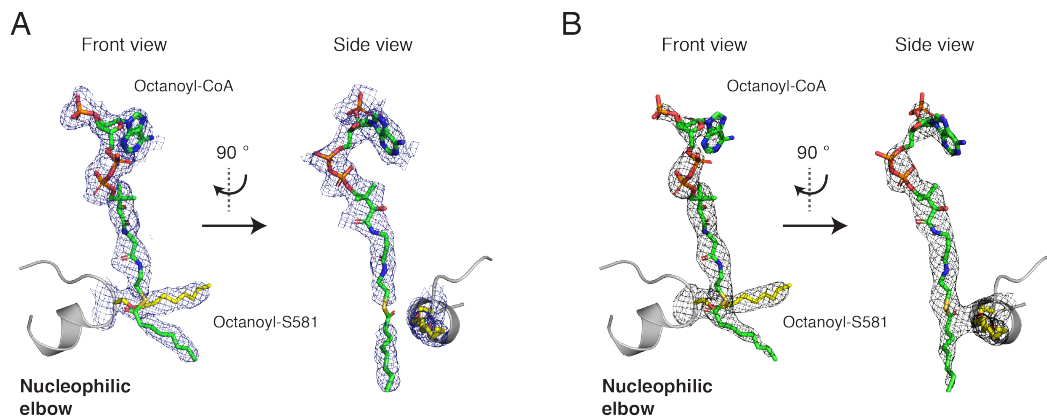

**Figure S2: Validation of ligand placement in the MAT domain.** Octanoyl-CoA and the covalent bound octanoyl-S581 were placed based on unbiased electron density maps. The FEM map (A) is shown in blue and the Polder map (B) in black. Contour levels are at  $3\sigma$ .

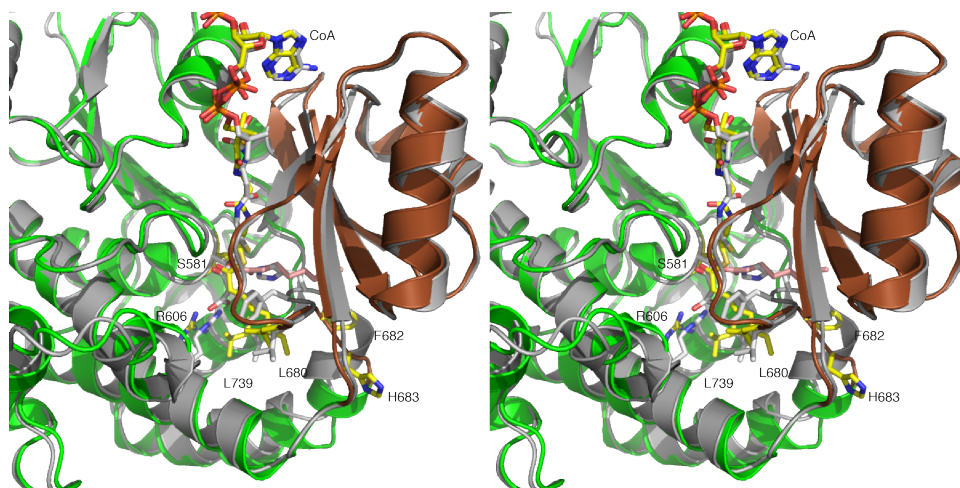

**Figure S3: Stereo cartoon diagram to illustrate conformational changes in the MAT domain.** Substrate bound chains (D) of the octanoyl-bound and malonyl-bound (grey) structures superimposed based on the  $\alpha/\beta$ -hydrolase fold. Residues S581, R606, L680, F682, H683 and L739 and bound moieties are shown in stick representation. Green and brown colouring indicate the regions of  $\alpha/\beta$ -hydrolase fold and the ferredoxin-like fold respectively for the octanoyl-bound model.

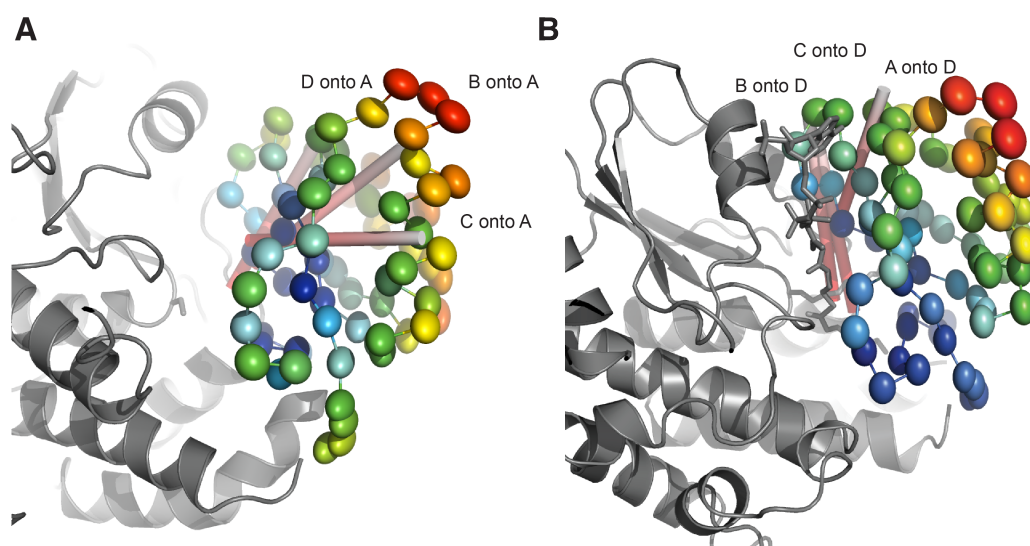

**Figure S4: Anisotropic movement of C-alpha atoms in the ferredoxin-like subdomain.** The anisotropic movement, as derived from the TLS tensors, is depicted by thermal ellipsoids colored by B-values (blue – low values; and red – high values) for the ferredoxin-like fold (616-684) region of chain A (A) and chain D (B). Rotation axes derived from superposition of ferredoxin-like fold (616-684) of chains B (A), C (B), and D (C) onto A (D) are shown in red-white cylindrical bars. For orientation, the rest of the KS-MAT chain is shown in grey.

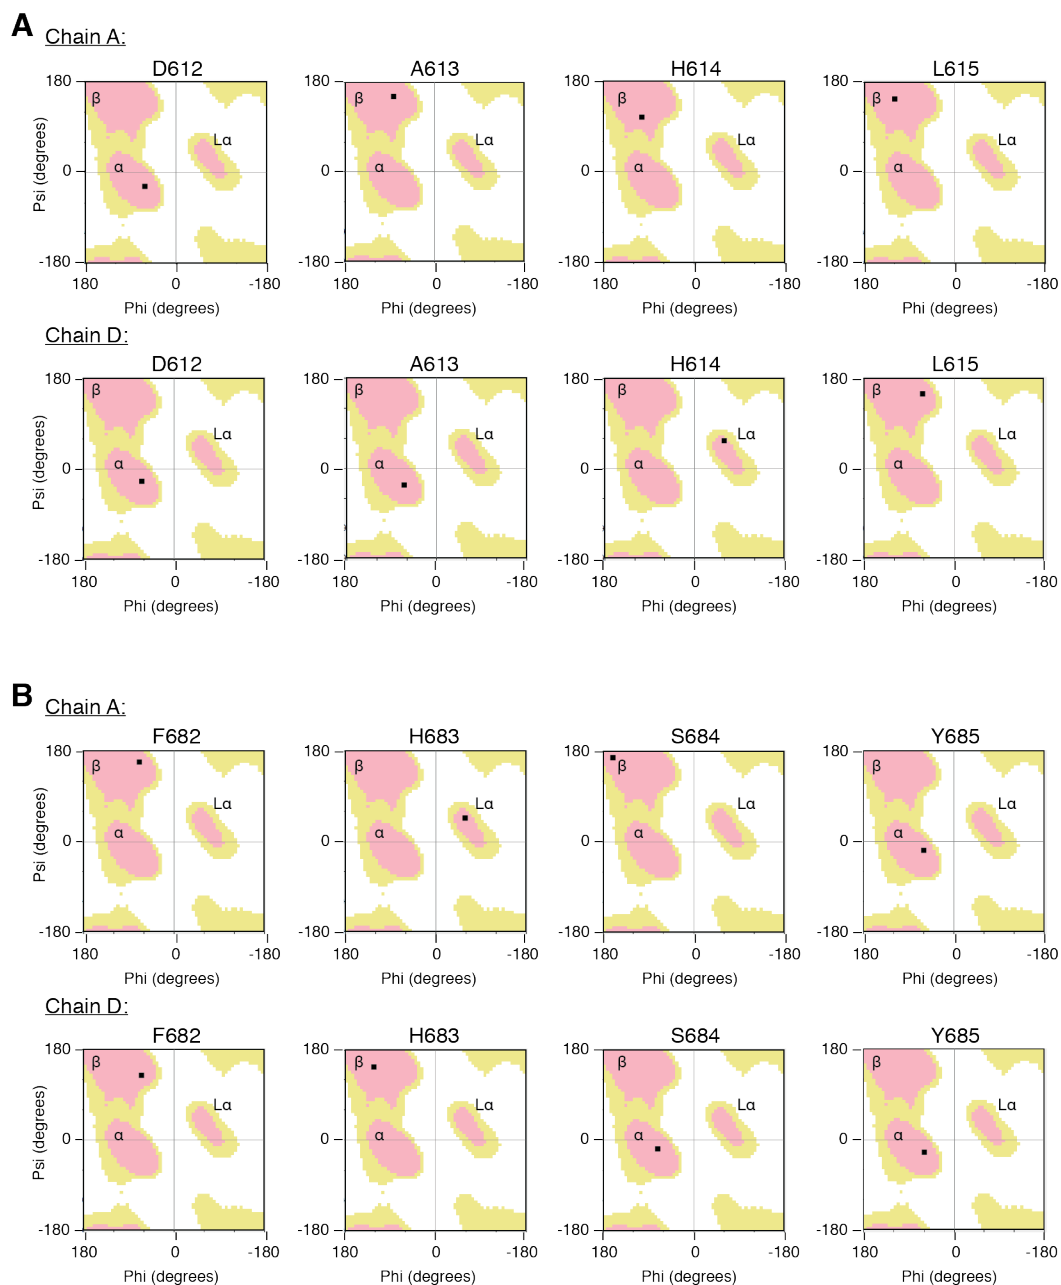

**Figure S5: Ramachandran plots for crucial residues in both subdomain linkers.** Significant changes in dihedral angles were seen for residues in linker 1 (A) 612-615 and linker 2 (B) 682-685 leading to changes to different allowed regions. Plots were created in coot. Used abbreviations indicate  $\alpha$  – right-handed helical region,  $L\alpha$  – left-handed helical region and  $\beta$  –  $\beta$ -sheet region.

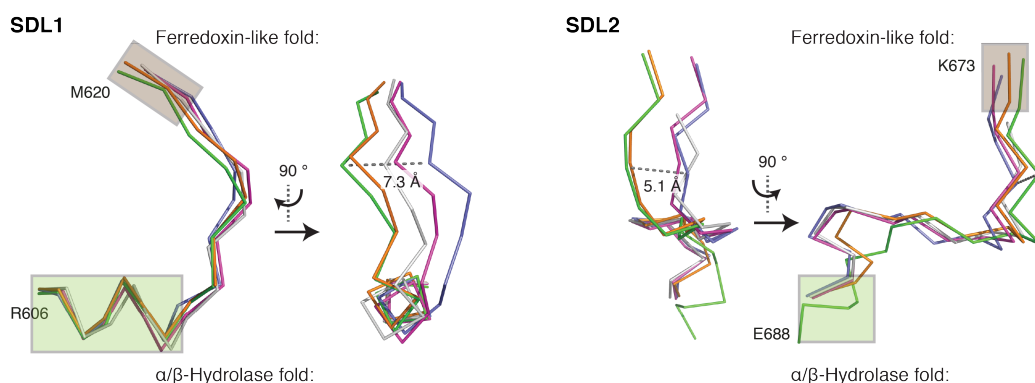

**Figure S6: Dynamics of the MAT domain is determined by flexible subdomain linkers.** SDL1 (612-617, left panel) and SDL2 (675-684, right panel) are shown as ribbons after  $\alpha/\beta$ -hydrolase fold based alignments. Both linker stretches are shown from two different perspectives rotated by 90°. Chain A (blue), chain C (grey) and chain D (green) from the octanoyl-CoA soaked crystal (PDB code 6rop), malonyl-bound (orange) (PDB code 5my0; chain D) and apo human MAT (purple) (PDB code 3hhd; chain A) were used. Green and brown rectangles indicate secondary structure elements of the  $\alpha/\beta$ -hydrolase- and ferredoxin-like subdomains, respectively.

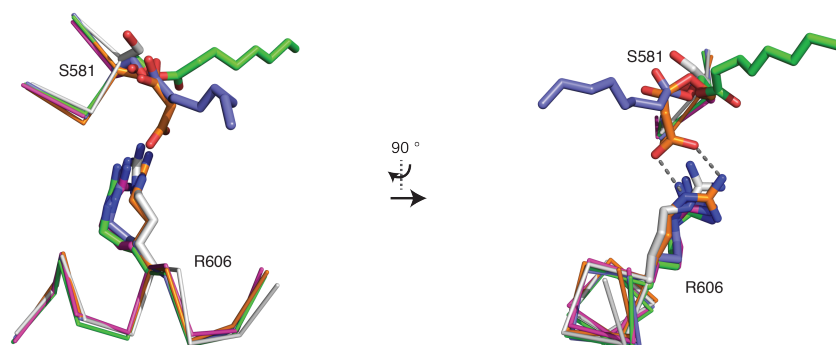

**Figure S7: Rotational freedom of residue R606.**  $\alpha/\beta$ -Hydrolase based superposition (BB of 488-615) of chain A (blue), chain C (white) and chain D (green) from octanoyl-CoA soaked crystals (PDB code 6rop) with the malonyl-bound structure (orange) (PDB code 5my0; chain D) and of porcine FAS (purple) (PDB code 2vz9; chain A). Important residues S581 and R606 are shown in sticks with covalent modifications of the serine represented also in sticks. For clarity residue stretch 580-583 and 601-610 are depicted as ribbons. R606 in octanoyl-bound active sites adopts the same conformation as R606 in the porcine FAS, whereas R606 in chain C (unbound) possesses the rotameric state of the unbound active sites previously found in human KS-MAT (3hhd).<sup>64</sup>

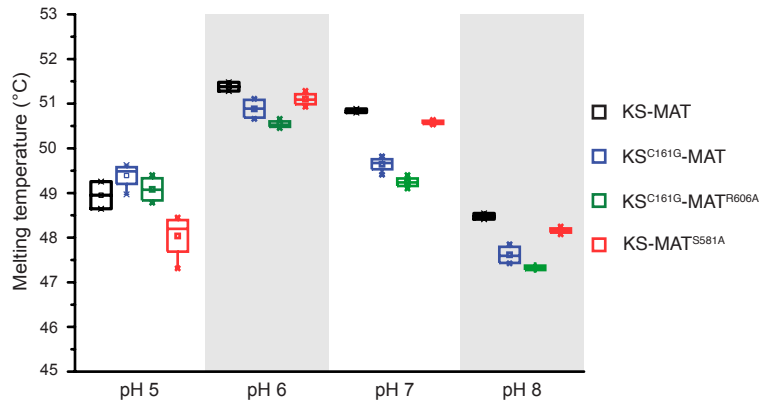

**Figure S8: Stability of select KS-MAT variants.** Melting temperatures were determined by a thermal shift assay as described in the Methods section. The four constructs were tested in phosphate buffers at different pH value. Four replicates are shown as dot plot.

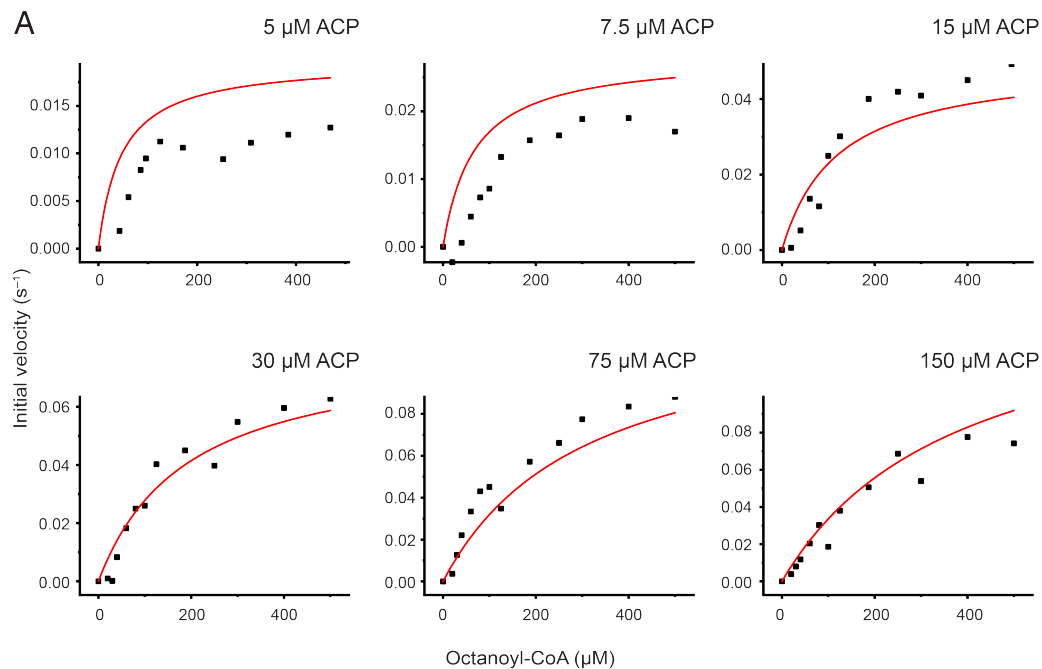

**B**

| Substrate | $K_m^{X-CoA}$ ( $\mu M$ ) | $K_m^{ACP}$ ( $\mu M$ ) | $k_{cat}$ ( $s^{-1}$ ) |
|-----------|---------------------------|-------------------------|------------------------|
| C8-CoA    | $511 \pm 135$             | $50 \pm 12$             | $0.22 \pm 0.04$        |
| C14-CoA   | $231 \pm 41$              | $7 \pm 2.5$             | $0.07 \pm 0.006$       |

**Figure S9: Global Michaelis-Menten fit of KS-mediated transacylation data.** (A) Initial velocities were plotted against octanoyl-CoA (C8-CoA) concentrations at six fixed ACP concentrations. Data were fit globally with the Michaelis-Menten equation assuming a ping-pong bi-bi mechanism. (B) Absolute kinetic parameter derived from the respective global fits for C8- and C14-CoA, respectively. No parameters constraints were set for the fit function.

**Table S1:** Dimerization interface of the KS domain

| Interface  | Residues per side |     | Solvent-accessible interface area |     | Solvent energy gain per side | Hydrogen bonds | Salt bridges |
|------------|-------------------|-----|-----------------------------------|-----|------------------------------|----------------|--------------|
|            | #                 | %   | Å <sup>2</sup>                    | %   | kcal/mol                     |                |              |
| KS chain A | 73                | 8.6 | 2583                              | 8.1 | -14.9                        | 38             | 0            |
| KS chain B | 71                | 8.5 | 2578                              | 8.0 | -14.8                        |                | 0            |
| KS chain C | 72                | 8.5 | 2586                              | 7.9 | -14.5                        | 34             | 0            |
| KS chain D | 75                | 8.8 | 2582                              | 8.1 | -15.0                        |                | 0            |

**Table S2:** Primers and Plasmids

| Number | Name           | Length | Orientation | Sequence (5'3')                      | Construct Template |
|--------|----------------|--------|-------------|--------------------------------------|--------------------|
| AR301  | mMAT_S580X_rev | 20     | reverse     | gtgcccaatgatgccgtcag                 | pAR69/pAR70        |
| AR310  | mMAT_S580A_for | 38     | forward     | ggcatcattgggcacGcctgggagaggtgcctgtgg | pAR69/pAR70        |

  

| Number  | Construct                                 | Name                                              |
|---------|-------------------------------------------|---------------------------------------------------|
| pAR069* | KS-MAT                                    | pAR69_STRI_m(KS_MAT)_H8_pET22b                    |
| pAR070* | KS <sup>C161G</sup> -MAT                  | pAR70_StrepI_m(KS(C161G)_MAT)_H8_pET22b           |
| pAR071* | KS <sup>C161G</sup> -MAT <sup>R606A</sup> | pAR71_StrepI_m(KS(C161G)_ATmut(R(606A))_H8_pET22b |
| pAR159  | KS-MAT <sup>S581A</sup>                   | pAR159_StrepI_m(KS_MAT(S581A))_H8_pET22b          |
| pAR160  | KS <sup>C161G</sup> -MAT <sup>S581A</sup> | pAR160_StrepI_m(KS(C161G)_MAT(S581A))_H8_pET22b   |
| pAR352* | (holo)-ACP                                | pAR352_StrepII_mACP_H8_RBS_SFP_pET22b             |
